# Supplementary material
Source: PubMed Central journal article supplement (PMC5198905)
Supplement: NIHMS834965-supplement-01.pdf [file NIHMS834965-supplement-01.pdf]

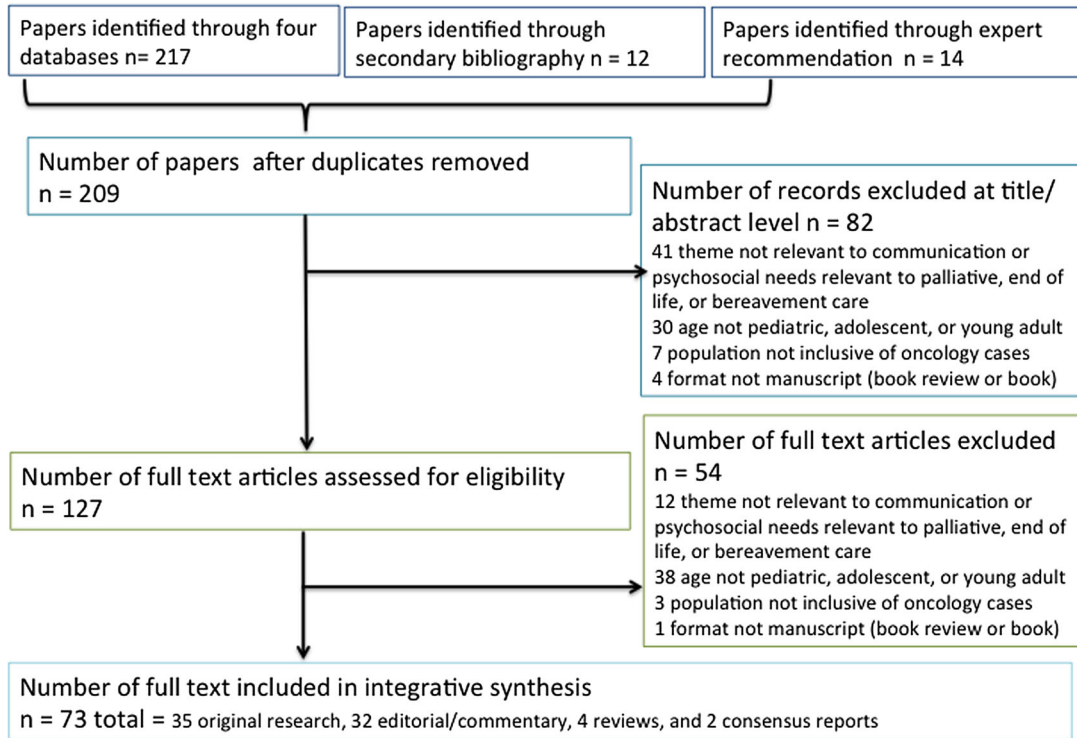

**Supplemental Figure I. Preferred Reporting for systematic Reviews and Meta-Analyses (PRISMA) Flow Diagram.**
